# Supplementary material for: On the Structural Performance of Recycled Aggregate Concrete Columns with Glass Fiber-Reinforced Composite Bars and Hoops
Source: MDPI journal article supplement (doi:10.3390/polym13091508), 2021-05-07
Supplement: s1 [file s1]

**Table S1.** Constructed experimental database (GS = GFRP spirals, GH = GFRP hoops, SS = steel spirals, SH = steel hoops, N = no lateral reinforcement, AS = axial strength).

| Sr. No. | Research study       | $B$  | $H$  | $D$  | $f'_c$ | $f_u$ | $E_f$ | $\varepsilon_u$ | Longitudinal bars |              | Transverse confinement |              | AS     |
|---------|----------------------|------|------|------|--------|-------|-------|-----------------|-------------------|--------------|------------------------|--------------|--------|
|         |                      | (mm) | (mm) | (mm) | (MPa)  | (MPa) | (GPa) | (%)             | Bars              | $\rho_l$ (%) | Type                   | $\rho_t$ (%) | (kN)   |
| 1       | Afifi et al. [1]     | -    | -    | 300  | 20     | 934   | 55.4  | 1.56            | 8 No. 5           | 2.2          | GS                     | 1            | 2920   |
| 2       | Afifi et al. [1]     | -    | -    | 300  | 20     | 934   | 55.4  | 1.56            | 4 No. 5           | 1.1          | GS                     | 1            | 2826   |
| 3       | Afifi et al. [1]     | -    | -    | 300  | 20     | 934   | 55.4  | 1.56            | 12 No. 5          | 3.2          | GS                     | 1            | 2998   |
| 4       | Afifi et al. [1]     | -    | -    | 300  | 20     | 934   | 55.4  | 1.56            | 8 No. 5           | 2.2          | GS                     | 0.45         | 2857   |
| 5       | Afifi et al. [1]     | -    | -    | 300  | 20     | 934   | 55.4  | 1.56            | 8 No. 5           | 2.2          | GS                     | 1.87         | 3019   |
| 6       | Afifi et al. [1]     | -    | -    | 300  | 20     | 934   | 55.4  | 1.56            | 8 No. 5           | 2.2          | GS                     | 2.07         | 2964   |
| 7       | Afifi et al. [1]     | -    | -    | 300  | 20     | 934   | 55.4  | 1.56            | 8 No. 5           | 2.2          | GS                     | 0.69         | 2804   |
| 8       | Afifi et al. [1]     | -    | -    | 300  | 20     | 934   | 55.4  | 1.56            | 8 No. 5           | 2.2          | GS                     | 1.03         | 2951   |
| 9       | Afifi et al. [1]     | -    | -    | 300  | 20     | 934   | 55.4  | 1.56            | 8 No. 5           | 2.2          | GS                     | 1.03         | 2865   |
| 10      | Afifi et al. [2]     | -    | -    | 301  | 21     | 934   | 55.4  | 1.56            | 8 No. 5           | 2.2          | GS                     | 1.5          | 2840   |
| 11      | Afifi et al. [2]     | -    | -    | 302  | 22     | 934   | 55.4  | 1.56            | 8 No. 5           | 2.2          | GS                     | 1.5          | 2871   |
| 12      | Afifi et al. [2]     | -    | -    | 303  | 23     | 934   | 55.4  | 1.56            | 8 No. 5           | 2.2          | GS                     | 1.5          | 2935   |
| 13      | AlAjarmeh et al. [3] | -    | -    | 250  | 31.8   | 1237  | 60    | 2.1             | 6 No. 5           | 2.41         | GS                     | 1.49         | 1588   |
| 14      | AlAjarmeh et al. [3] | -    | -    | 250  | 31.8   | 1237  | 60    | 2.1             | 6 No. 5           | 2.47         | GS                     | 1.56         | 1408   |
| 15      | AlAjarmeh et al. [3] | -    | -    | 250  | 31.8   | 1237  | 60    | 2.1             | 6 No. 5           | 2.59         | GS                     | 1.69         | 1559   |
| 16      | AlAjarmeh et al. [3] | -    | -    | 250  | 31.8   | 1237  | 60    | 2.1             | 6 No. 5           | 2.78         | GS                     | 1.92         | 1411   |
| 17      | AlAjarmeh et al. [4] | -    | -    | 251  | 25     | 1281  | 61.3  | 2.1             | 6 No. 4           | 1.78         | GS                     | 1.57         | 1035.3 |
| 18      | AlAjarmeh et al. [4] | -    | -    | 252  | 25     | 1237  | 60.5  | 2.1             | 6 No. 5           | 2.79         | GS                     | 1.57         | 1109.2 |
| 19      | AlAjarmeh et al. [4] | -    | -    | 253  | 25     | 1270  | 60.5  | 2.1             | 6 No. 6           | 4            | GS                     | 1.57         | 1247.9 |
| 20      | AlAjarmeh et al. [4] | -    | -    | 254  | 25     | 1237  | 60.5  | 2.1             | 4 No. 5           | 1.86         | GS                     | 1.57         | 983.3  |
| 21      | AlAjarmeh et al. [4] | -    | -    | 255  | 25     | 1237  | 60.5  | 2.1             | 8 No. 5           | 3.72         | GS                     | 1.57         | 1406.1 |
| 22      | AlAjarmeh et al. [4] | -    | -    | 256  | 25     | 1281  | 61.3  | 2.1             | 9 No. 4           | 2.67         | GS                     | 1.57         | 1204.2 |
| 23      | Alsayed et al. [5]   | 250  | 450  | -    | 39     | 800   | 40    | 1.5             | 6 No. 5           | 1            | SH                     | 0.15         | 3285   |
| 24      | Alsayed et al. [5]   | 250  | 450  | -    | 39     | 800   | 40    | 1.5             | 6 No. 5           | 1            | SH                     | 0.15         | 3285   |
| 25      | Alsayed et al. [5]   | 250  | 450  | -    | 39     | 800   | 40    | 1.5             | 6 No. 5           | 1            | SH                     | 0.15         | 3285   |
| 26      | Alsayed et al. [5]   | 250  | 450  | -    | 38.5   | 800   | 40    | 1.5             | 6 No. 5           | 1            | GH                     | 0.18         | 3301   |
| 27      | Alsayed et al. [5]   | 250  | 450  | -    | 38.5   | 800   | 40    | 1.5             | 6 No. 5           | 1            | GH                     | 0.18         | 3301   |
| 28      | Alsayed et al. [5]   | 250  | 450  | -    | 38.5   | 800   | 40    | 1.5             | 6 No. 5           | 1            | GH                     | 0.18         | 3301   |
| 29      | De Luca et al. [6]   | 610  | 610  | -    | 43.7   | 608   | 44.2  | 1.38            | 8 No. 8           | 1            | GH                     | 0.63         | 15235  |
| 30      | De Luca et al. [6]   | 610  | 610  | -    | 40.6   | 712   | 44.4  | 1.6             | 8 No. 8           | 1            | GH                     | 0.63         | 12949  |
| 31      | De Luca et al. [6]   | 610  | 610  | -    | 36.1   | 608   | 44.2  | 1.38            | 8 No. 8           | 1            | GH                     | 2.5          | 11926  |
| 32      | De Luca et al. [6]   | 610  | 610  | -    | 32.8   | 712   | 44.4  | 1.6             | 8 No. 8           | 1            | GH                     | 2.5          | 10751  |
| 33      | Dong et al. [7]      | -    | -    | 215  | 40     | 930   | 59    | 1.6             | 3 No. 3           | 0.55         | GS                     | 0.94         | 1018   |
| 34      | Dong et al. [7]      | -    | -    | 215  | 40     | 930   | 59    | 1.6             | 4 No. 3           | 0.73         | GS                     | 0.94         | 1179   |
| 35      | Dong et al. [7]      | -    | -    | 215  | 40     | 930   | 59    | 1.6             | 5 No. 3           | 0.92         | GS                     | 0.94         | 1288   |
| 36      | Dong et al. [7]      | -    | -    | 215  | 40     | 930   | 59    | 1.6             | 6 No. 3           | 1.1          | GS                     | 0.94         | 1381   |
| 37      | Dong et al. [7]      | -    | -    | 215  | 40     | 930   | 59    | 1.6             | 4 No. 3           | 0.73         | GS                     | 2.75         | 1459   |
| 38      | Dong et al. [7]      | -    | -    | 215  | 40     | 930   | 59    | 1.6             | 4 No. 3           | 0.73         | GS                     | 2.75         | 1037   |

|    |                        |     |     |     |      |      |    |     |         |      |    |      |      |
|----|------------------------|-----|-----|-----|------|------|----|-----|---------|------|----|------|------|
| 39 | Dong et al. [7]        | -   | -   | 215 | 40   | 880  | 59 | 1.6 | 4 No. 3 | 0.73 | GS | 2.75 | 523  |
| 40 | Dong et al. [7]        | -   | -   | 215 | 37   | 880  | 59 | 1.6 | 4 No. 3 | 0.73 | GS | 2.75 | 318  |
| 41 | Dong et al. [7]        | -   | -   | 215 | 37   | 880  | 59 | 1.6 | 5 No. 3 | 0.73 | GS | 1.39 | 1290 |
| 42 | Dong et al. [7]        | -   | -   | 215 | 37   | 880  | 59 | 1.6 | 6 No. 3 | 0.73 | GS | 1.39 | 944  |
| 43 | Dong et al. [7]        | -   | -   | 215 | 37   | 880  | 59 | 1.6 | 7 No. 3 | 0.73 | GS | 1.39 | 527  |
| 44 | Dong et al. [7]        | -   | -   | 215 | 37   | 880  | 59 | 1.6 | 8 No. 3 | 0.73 | GS | 1.39 | 296  |
| 45 | Elchalakani and Ma [8] | 160 | 260 | -   | 32.8 | 1200 | 50 | 2.4 | 6 No. 4 | 1.8  | GH | 0.5  | 1367 |
| 46 | Elchalakani and Ma [8] | 160 | 260 | -   | 32.8 | 1200 | 50 | 2.4 | 6 No. 4 | 1.8  | GH | 0.5  | 880  |
| 47 | Elchalakani and Ma [8] | 160 | 260 | -   | 32.8 | 1200 | 50 | 2.4 | 6 No. 4 | 1.8  | GH | 0.5  | 584  |
| 48 | Elchalakani and Ma [8] | 160 | 260 | -   | 32.8 | 1200 | 50 | 2.4 | 6 No. 4 | 1.8  | GH | 1    | 1449 |
| 49 | Elchalakani and Ma [8] | 160 | 260 | -   | 32.8 | 1200 | 50 | 2.4 | 6 No. 4 | 1.8  | GH | 1    | 917  |
| 50 | Elchalakani and Ma [8] | 160 | 260 | -   | 32.8 | 1200 | 50 | 2.4 | 6 No. 4 | 1.8  | GH | 1    | 788  |
| 51 | Elchalakani and Ma [8] | 160 | 260 | -   | 32.8 | 1200 | 50 | 2.4 | 6 No. 4 | 1.8  | GH | 0.3  | 1402 |
| 52 | Elchalakani et al. [9] | 160 | 260 | -   | 32.8 | 930  | 59 | 1.7 | 6 No. 4 | 1.8  | GH | 0.3  | 1402 |
| 53 | Elchalakani et al. [9] | 160 | 260 | -   | 32.8 | 930  | 59 | 1.7 | 6 No. 4 | 1.8  | GH | 0.5  | 1367 |
| 54 | Elchalakani et al. [9] | 160 | 260 | -   | 32.8 | 930  | 59 | 1.7 | 6 No. 4 | 1.8  | GH | 1    | 1449 |
| 55 | Elchalakani et al. [9] | 160 | 260 | -   | 32.8 | 930  | 59 | 1.7 | 6 No. 4 | 1.8  | GH | 0.5  | 880  |
| 56 | Elchalakani et al. [9] | 160 | 260 | -   | 32.8 | 930  | 59 | 1.7 | 6 No. 4 | 1.8  | GH | 1    | 917  |
| 57 | Elchalakani et al. [9] | 160 | 260 | -   | 32.8 | 930  | 59 | 1.7 | 6 No. 4 | 1.8  | GH | 1    | 788  |
| 58 | Elchalakani et al. [9] | 160 | 260 | -   | 32.8 | 930  | 59 | 1.7 | 6 No. 4 | 1.8  | GH | 0.5  | 584  |
| 59 | Elchalakani et al. [9] | 160 | 260 | -   | 32.8 | 930  | 59 | 1.7 | 6 No. 4 | 1.8  | GH | 0.3  | 1041 |
| 60 | Elchalakani et al. [9] | 160 | 260 | -   | 32.8 | 930  | 59 | 1.7 | 6 No. 4 | 1.8  | GH | 0.5  | 1194 |
| 61 | Elchalakani et al. [9] | 160 | 260 | -   | 32.8 | 930  | 59 | 1.7 | 6 No. 4 | 1.8  | GH | 1    | 1357 |
| 62 | Elchalakani et al. [9] | 160 | 260 | -   | 32.8 | 930  | 59 | 1.7 | 6 No. 4 | 1.8  | GH | 0.5  | 657  |
| 63 | Elchalakani et al. [9] | 160 | 260 | -   | 32.8 | 930  | 59 | 1.7 | 6 No. 4 | 1.8  | GH | 1    | 804  |
| 64 | Elchalakani et al. [9] | 160 | 160 | -   | 32.8 | 930  | 59 | 1.7 | 6 No. 4 | 1.8  | GH | 0.5  | 353  |
| 65 | Elchalakani et al. [9] | 160 | 160 | -   | 32.8 | 930  | 59 | 1.7 | 6 No. 4 | 1.8  | GH | 1    | 454  |
| 66 | Elchalakani et al. [9] | 160 | 160 | -   | 32.8 | 930  | 59 | 1.7 | 6 No. 4 | 1.8  | GH | 0.5  | 234  |
| 67 | Elchalakani et al. [9] | 160 | 160 | -   | 32.8 | 930  | 59 | 1.7 | 6 No. 4 | 1.8  | GH | 1    | 244  |
| 68 | Guerin et al. [10]     | 405 | 405 | -   | 25.3 | 600  | 40 | 1.5 | 6 No. 6 | 1    | GH | 0.66 | 4587 |
| 69 | Guerin et al. [10]     | 405 | 405 | -   | 25.3 | 600  | 40 | 1.5 | 6 No. 6 | 1    | GH | 0.66 | 3433 |
| 70 | Guerin et al. [10]     | 405 | 405 | -   | 25.3 | 600  | 40 | 1.5 | 6 No. 6 | 1    | GH | 0.66 | 1591 |
| 71 | Guerin et al. [10]     | 405 | 405 | -   | 25.3 | 600  | 40 | 1.5 | 6 No. 6 | 1    | GH | 0.66 | 645  |
| 72 | Guerin et al. [10]     | 405 | 405 | -   | 25.3 | 600  | 40 | 1.5 | 6 No. 6 | 1    | GH | 0.66 | 4616 |
| 73 | Guerin et al. [10]     | 405 | 405 | -   | 25.3 | 600  | 40 | 1.5 | 6 No. 6 | 1    | GH | 0.66 | 3405 |
| 74 | Guerin et al. [10]     | 405 | 405 | -   | 25.3 | 600  | 40 | 1.5 | 6 No. 6 | 1    | GH | 0.66 | 1576 |
| 75 | Guerin et al. [10]     | 405 | 405 | -   | 25.3 | 600  | 40 | 1.5 | 6 No. 6 | 1    | GH | 0.66 | 636  |
| 76 | Guerin et al. [11]     | 405 | 405 | -   | 25.3 | 600  | 40 | 1.5 | 8 No. 6 | 1.4  | GH | 0.84 | 5028 |
| 77 | Guerin et al. [11]     | 405 | 405 | -   | 25.3 | 600  | 40 | 1.5 | 8 No. 6 | 1.4  | GH | 0.84 | 3627 |
| 78 | Guerin et al. [11]     | 405 | 405 | -   | 25.3 | 600  | 40 | 1.5 | 8 No. 6 | 1.4  | GH | 0.84 | 2035 |
| 79 | Guerin et al. [11]     | 405 | 405 | -   | 25.3 | 600  | 40 | 1.5 | 8 No. 6 | 1.4  | GH | 0.84 | 914  |
| 80 | Guerin et al. [11]     | 405 | 405 | -   | 25.3 | 600  | 40 | 1.5 | 8 No. 8 | 2.5  | GH | 0.63 | 5294 |

|     |                     |     |     |     |      |      |      |      |          |     |    |      |      |
|-----|---------------------|-----|-----|-----|------|------|------|------|----------|-----|----|------|------|
| 81  | Guerin et al. [11]  | 405 | 405 | -   | 25.3 | 600  | 40   | 1.5  | 8 No. 8  | 2.5 | GH | 0.63 | 3790 |
| 82  | Guerin et al. [11]  | 405 | 405 | -   | 25.3 | 600  | 40   | 1.5  | 8 No. 8  | 2.5 | GH | 0.63 | 2110 |
| 83  | Guerin et al. [11]  | 405 | 405 | -   | 25.3 | 600  | 40   | 1.5  | 8 No. 8  | 2.5 | GH | 0.63 | 1008 |
| 84  | Hadhood et al. [12] | -   | -   | 305 | 35   | 1680 | 141  | 1.19 | 8 No. 5  | 2.2 | GH | 2.68 | 2564 |
| 85  | Hadhood et al. [12] | -   | -   | 305 | 35   | 1680 | 141  | 1.19 | 8 No. 5  | 2.2 | GH | 2.68 | 2060 |
| 86  | Hadhood et al. [12] | -   | -   | 305 | 35   | 1680 | 141  | 1.19 | 8 No. 5  | 2.2 | GH | 2.68 | 1511 |
| 87  | Hadhood et al. [12] | -   | -   | 305 | 35   | 1680 | 141  | 1.19 | 8 No. 5  | 2.2 | GH | 2.68 | 776  |
| 88  | Hadhood et al. [12] | -   | -   | 305 | 35   | 1680 | 141  | 1.19 | 8 No. 5  | 2.2 | GH | 2.68 | 366  |
| 89  | Hadhood et al. [12] | -   | -   | 305 | 35   | 1680 | 141  | 1.19 | 8 No. 5  | 2.2 | GS | 1    | 2608 |
| 90  | Hadhood et al. [12] | -   | -   | 305 | 35   | 1680 | 141  | 1.19 | 8 No. 5  | 2.2 | GS | 1    | 2134 |
| 91  | Hadhood et al. [12] | -   | -   | 305 | 35   | 1680 | 141  | 1.19 | 8 No. 5  | 2.2 | GS | 1    | 1513 |
| 92  | Hadhood et al. [12] | -   | -   | 305 | 35   | 1680 | 141  | 1.19 | 8 No. 5  | 2.2 | GS | 1    | 745  |
| 93  | Hadhood et al. [12] | -   | -   | 305 | 35   | 1680 | 141  | 1.19 | 8 No. 5  | 2.2 | GS | 1    | 654  |
| 94  | Hadhood et al. [12] | -   | -   | 305 | 35   | 1680 | 141  | 1.19 | 12 No. 5 | 3.3 | GS | 1    | 2670 |
| 95  | Hadhood et al. [12] | -   | -   | 305 | 35   | 1680 | 141  | 1.19 | 12 No. 5 | 3.3 | GS | 1    | 2123 |
| 96  | Hadhood et al. [12] | -   | -   | 305 | 35   | 1680 | 141  | 1.19 | 12 No. 5 | 3.3 | GS | 1    | 1527 |
| 97  | Hadhood et al. [12] | -   | -   | 305 | 35   | 1680 | 141  | 1.19 | 12 No. 5 | 3.3 | GS | 1    | 852  |
| 98  | Hadhood et al. [12] | -   | -   | 305 | 35   | 1680 | 141  | 1.19 | 12 No. 5 | 3.3 | GS | 1    | 378  |
| 99  | Hadhood et al. [13] | -   | -   | 305 | 35   | 1680 | 141  | 1.19 | 8 No. 5  | 2.2 | GS | 1.8  | 2652 |
| 100 | Hadhood et al. [13] | -   | -   | 305 | 35   | 1680 | 141  | 1.19 | 8 No. 5  | 2.2 | GS | 1.8  | 2086 |
| 101 | Hadhood et al. [13] | -   | -   | 305 | 35   | 1680 | 141  | 1.19 | 8 No. 5  | 2.2 | GS | 1.8  | 1483 |
| 102 | Hadhood et al. [13] | -   | -   | 305 | 35   | 1680 | 141  | 1.19 | 8 No. 5  | 2.2 | GS | 1.8  | 747  |
| 103 | Hadhood et al. [13] | -   | -   | 305 | 35   | 1680 | 141  | 1.19 | 8 No. 5  | 2.2 | GS | 1.8  | 655  |
| 104 | Hadhood et al. [13] | -   | -   | 305 | 70.2 | 1289 | 54.9 | 2.3  | 8 No. 5  | 2.2 | GS | 1.1  | 4709 |
| 105 | Hadhood et al. [13] | -   | -   | 305 | 70.2 | 1289 | 54.9 | 2.3  | 8 No. 5  | 2.2 | GS | 1.1  | 3309 |
| 106 | Hadhood et al. [13] | -   | -   | 305 | 70.2 | 1289 | 54.9 | 2.3  | 8 No. 5  | 2.2 | GS | 1.1  | 2380 |
| 107 | Hadhood et al. [13] | -   | -   | 305 | 70.2 | 1289 | 54.9 | 2.3  | 8 No. 5  | 2.2 | GS | 1.1  | 1112 |
| 108 | Hadhood et al. [13] | -   | -   | 305 | 70.2 | 1289 | 54.9 | 2.3  | 8 No. 5  | 2.2 | GS | 1.1  | 797  |
| 109 | Hadhood et al. [13] | -   | -   | 305 | 70.2 | 1289 | 54.9 | 2.3  | 8 No. 5  | 2.2 | GH | 1.1  | 4689 |
| 110 | Hadhood et al. [13] | -   | -   | 305 | 70.2 | 1289 | 54.9 | 2.3  | 8 No. 5  | 2.2 | GH | 1.1  | 3299 |
| 111 | Hadhood et al. [13] | -   | -   | 305 | 70.2 | 1289 | 54.9 | 2.3  | 8 No. 5  | 2.2 | GH | 1.1  | 2435 |
| 112 | Hadhood et al. [13] | -   | -   | 305 | 70.2 | 1289 | 54.9 | 2.3  | 8 No. 5  | 2.2 | GH | 1.1  | 1054 |
| 113 | Hadhood et al. [13] | -   | -   | 305 | 70.2 | 1289 | 54.9 | 2.3  | 8 No. 5  | 2.2 | GH | 1.1  | 838  |
| 114 | Hadhood et al. [13] | -   | -   | 305 | 70.2 | 1289 | 54.9 | 2.3  | 12 No. 5 | 3.2 | GS | 1.1  | 4716 |
| 115 | Hadhood et al. [13] | -   | -   | 305 | 70.2 | 1289 | 54.9 | 2.3  | 12 No. 5 | 3.2 | GS | 1.1  | 3380 |
| 116 | Hadhood et al. [13] | -   | -   | 305 | 70.2 | 1289 | 54.9 | 2.3  | 12 No. 5 | 3.2 | GS | 1.1  | 2339 |
| 117 | Hadhood et al. [13] | -   | -   | 305 | 70.2 | 1289 | 54.9 | 2.3  | 12 No. 5 | 3.2 | GS | 1.1  | 1135 |
| 118 | Hadhood et al. [13] | -   | -   | 305 | 70.2 | 1289 | 54.9 | 2.3  | 12 No. 5 | 3.2 | GS | 1.1  | 713  |
| 119 | Hadhood et al. [13] | -   | -   | 305 | 70.2 | 1289 | 54.9 | 2.3  | 8 No. 5  | 2.2 | GS | 1.1  | 5120 |
| 120 | Hadhood et al. [13] | -   | -   | 305 | 70.2 | 1289 | 54.9 | 2.3  | 8 No. 5  | 2.2 | GS | 1.1  | 3671 |
| 121 | Hadhood et al. [13] | -   | -   | 305 | 70.2 | 1289 | 54.9 | 2.3  | 8 No. 5  | 2.2 | GS | 1.1  | 2538 |
| 122 | Hadhood et al. [13] | -   | -   | 305 | 70.2 | 1289 | 54.9 | 2.3  | 8 No. 5  | 2.2 | GS | 1.1  | 1392 |

|     |                       |     |     |     |      |      |      |      |         |      |    |      |        |
|-----|-----------------------|-----|-----|-----|------|------|------|------|---------|------|----|------|--------|
| 123 | Hadhood et al. [13]   | -   | -   | 305 | 70.2 | 1289 | 54.9 | 2.3  | 8 No. 5 | 2.2  | GS | 1.1  | 611    |
| 124 | Hadhood et al. [13]   | -   | -   | 305 | 70.2 | 1289 | 54.9 | 2.3  | 8 No. 5 | 2.2  | GS | 1.7  | 4680   |
| 125 | Hadhood et al. [13]   | -   | -   | 305 | 70.2 | 1289 | 54.9 | 2.3  | 8 No. 5 | 2.2  | GS | 1.7  | 3341   |
| 126 | Hadhood et al. [13]   | -   | -   | 305 | 70.2 | 1289 | 54.9 | 2.3  | 8 No. 5 | 2.2  | GS | 1.7  | 2460   |
| 127 | Hadhood et al. [13]   | -   | -   | 305 | 70.2 | 1289 | 54.9 | 2.3  | 8 No. 5 | 2.2  | GS | 1.7  | 1061   |
| 128 | Hadhood et al. [13]   | -   | -   | 305 | 70.2 | 1289 | 54.9 | 2.3  | 8 No. 5 | 2.2  | GS | 1.7  | 682    |
| 129 | Hadhood et al. [13]   | -   | -   | 305 | 35   | 1289 | 54.9 | 2.3  | 8 No. 5 | 2.2  | GS | 1.1  | 2608   |
| 130 | Hadhood et al. [13]   | -   | -   | 305 | 35   | 1289 | 54.9 | 2.3  | 8 No. 5 | 2.2  | GS | 1.1  | 2134   |
| 131 | Hadhood et al. [13]   | -   | -   | 305 | 35   | 1289 | 54.9 | 2.3  | 8 No. 5 | 2.2  | GS | 1.1  | 1512   |
| 132 | Hadhood et al. [13]   | -   | -   | 305 | 35   | 1289 | 54.9 | 2.3  | 8 No. 5 | 2.2  | GS | 1.1  | 745    |
| 133 | Hadhood et al. [13]   | -   | -   | 305 | 35   | 1289 | 54.9 | 2.3  | 8 No. 5 | 2.2  | GS | 1.1  | 354    |
| 134 | Hadhood et al. [13]   | -   | -   | 305 | 35   | 1289 | 54.9 | 2.3  | 8 No. 5 | 2.2  | GS | 1.1  | 3090   |
| 135 | Hadhood et al. [13]   | -   | -   | 305 | 35   | 1289 | 54.9 | 2.3  | 8 No. 5 | 2.2  | GS | 1.1  | 2342   |
| 136 | Hadhood et al. [13]   | -   | -   | 305 | 35   | 1289 | 54.9 | 2.3  | 8 No. 5 | 2.2  | GS | 1.1  | 1746   |
| 137 | Hadhood et al. [13]   | -   | -   | 305 | 35   | 1289 | 54.9 | 2.3  | 8 No. 5 | 2.2  | GS | 1.1  | 995    |
| 138 | Hadhood et al. [13]   | -   | -   | 305 | 35   | 1289 | 54.9 | 2.3  | 8 No. 5 | 2.2  | GS | 1.1  | 529    |
| 139 | Hadhood et al. [13]   | -   | -   | 305 | 35   | 1289 | 54.9 | 2.3  | 8 No. 5 | 2.2  | GS | 1.1  | 2652   |
| 140 | Hadhood et al. [13]   | -   | -   | 305 | 35   | 1289 | 54.9 | 2.3  | 8 No. 5 | 2.2  | GS | 1.1  | 2086   |
| 141 | Hadhood et al. [13]   | -   | -   | 305 | 35   | 1289 | 54.9 | 2.3  | 8 No. 5 | 2.2  | GS | 1.1  | 1483   |
| 142 | Hadhood et al. [13]   | -   | -   | 305 | 35   | 1289 | 54.9 | 2.3  | 8 No. 5 | 2.2  | GS | 1.1  | 747    |
| 143 | Hadhood et al. [13]   | -   | -   | 305 | 35   | 1289 | 54.9 | 2.3  | 8 No. 5 | 2.2  | GS | 1.1  | 355    |
| 144 | Hadi et al. [14]      | -   | -   | 205 | 37   | 1200 | 50   | 2.4  | 6 No. 4 | 1.6  | GS | 2.1  | 1220   |
| 145 | Hadi et al. [14]      | -   | -   | 205 | 37   | 1200 | 50   | 2.4  | 6 No. 4 | 1.6  | GS | 2.1  | 781    |
| 146 | Hadi et al. [14]      | -   | -   | 205 | 37   | 1200 | 50   | 2.4  | 6 No. 4 | 1.6  | GS | 2.1  | 494    |
| 147 | Hadi et al. [14]      | -   | -   | 205 | 37   | 1200 | 50   | 2.4  | 6 No. 4 | 1.6  | GS | 4.2  | 1309   |
| 148 | Hadi et al. [14]      | -   | -   | 205 | 37   | 1200 | 50   | 2.4  | 6 No. 4 | 1.6  | GS | 4.2  | 767    |
| 149 | Hadi et al. [14]      | -   | -   | 205 | 37   | 1200 | 50   | 2.4  | 6 No. 4 | 1.6  | GS | 4.2  | 479    |
| 150 | Hadi and Youssef [15] | 210 | 210 | -   | 29.3 | 1641 | 67.9 | 2.41 | 4 No. 4 | 1    | GH | 2.74 | 1285   |
| 151 | Hadi and Youssef [15] | 210 | 210 | -   | 29.3 | 1641 | 67.9 | 2.41 | 4 No. 4 | 1    | GH | 2.74 | 803    |
| 152 | Hadi and Youssef [15] | 210 | 210 | -   | 29.3 | 1641 | 67.9 | 2.41 | 4 No. 4 | 1    | GH | 2.74 | 615    |
| 153 | Hassan et al. [16]    | -   | -   | 150 | 40   | 800  | 30   | 0.97 | 6 No. 3 | 2.1  | SS | 1.7  | 426.59 |
| 154 | Hassan et al. [16]    | -   | -   | 150 | 40   | 800  | 30   | 1.35 | 6 No. 3 | 2.1  | SS | 1.7  | 411.88 |
| 155 | Hassan et al. [16]    | -   | -   | 150 | 40   | 800  | 30   | 1.57 | 6 No. 3 | 2.1  | SS | 1.7  | 387.36 |
| 156 | Hassan et al. [16]    | -   | -   | 150 | 40   | 800  | 30   | 1.4  | 6 No. 3 | 2.1  | SS | 3.4  | 529.56 |
| 157 | Hassan et al. [16]    | -   | -   | 150 | 40   | 800  | 30   | 1.7  | 6 No. 3 | 2.1  | SS | 3.4  | 490.33 |
| 158 | Hassan et al. [16]    | -   | -   | 150 | 40   | 800  | 30   | 1.9  | 6 No. 3 | 2.1  | SS | 3.4  | 460.91 |
| 159 | Hassan et al. [16]    | -   | -   | 150 | 40   | 800  | 30   | 1.28 | 6 No. 3 | 2.1  | GH | 1.7  | 490.33 |
| 160 | Hassan et al. [16]    | -   | -   | 150 | 40   | 800  | 30   | 1.5  | 6 No. 3 | 2.1  | GH | 1.7  | 460.91 |
| 161 | Hassan et al. [16]    | -   | -   | 150 | 40   | 800  | 30   | 1.7  | 6 No. 3 | 2.1  | GH | 1.7  | 430.4  |
| 162 | Karim et al. [17]     | -   | -   | 205 | 37   | 1600 | 66   | 2.42 | 6 No. 4 | 4.72 | GS | 1.91 | 1425   |
| 163 | Karim et al. [17]     | -   | -   | 205 | 37   | 1600 | 66   | 2.42 | 6 No. 4 | 4.72 | GS | 3.82 | 2041   |
| 164 | Karim et al. [12]     | -   | -   | 206 | 37   | 1600 | 66   | 2.42 | 6 No. 4 | 4.72 | GS | 1.91 | 1425   |

|     |                             |     |     |     |       |      |      |      |         |      |    |      |      |
|-----|-----------------------------|-----|-----|-----|-------|------|------|------|---------|------|----|------|------|
| 165 | Karim et al. [12]           | -   | -   | 207 | 37    | 1600 | 66   | 2.42 | 6 No. 4 | 4.72 | GS | 1.91 | 781  |
| 166 | Karim et al. [12]           | -   | -   | 208 | 37    | 1600 | 66   | 2.42 | 6 No. 4 | 4.72 | GS | 1.91 | 494  |
| 167 | Karim et al. [12]           | -   | -   | 209 | 37    | 1600 | 66   | 2.42 | 6 No. 4 | 4.72 | GS | 3.82 | 2041 |
| 168 | Karim et al. [12]           | -   | -   | 210 | 37    | 1600 | 66   | 2.42 | 6 No. 4 | 4.72 | GS | 3.82 | 767  |
| 169 | Karim et al. [12]           | -   | -   | 211 | 37    | 1600 | 66   | 2.42 | 6 No. 4 | 4.72 | GS | 3.82 | 479  |
| 170 | Karim et al. [12]           | -   | -   | 212 | 37    | 1600 | 66   | 2.42 | 6 No. 4 | 4.72 | GS | 1.91 | 3068 |
| 171 | Karim et al. [12]           | -   | -   | 213 | 37    | 1600 | 66   | 2.42 | 6 No. 4 | 4.72 | GS | 1.91 | 1450 |
| 172 | Karim et al. [12]           | -   | -   | 214 | 37    | 1600 | 66   | 2.42 | 6 No. 4 | 4.72 | GS | 1.91 | 805  |
| 173 | Khan et al. [18]            | -   | -   | 206 | 37    | 1395 | 56   | 1.5  | 6 No. 5 | 3.57 | GH | -    | 2812 |
| 174 | Khan et al. [18]            | -   | -   | 206 | 37    | 1395 | 56   | 1.5  | 6 No. 5 | 3.57 | GH | -    | 1487 |
| 175 | Khan et al. [18]            | -   | -   | 206 | 37    | 1395 | 56   | 1.5  | 6 No. 5 | 3.57 | GH | -    | 910  |
| 176 | Khorramian & Sadeghian [19] | 150 | 150 | -   | 37    | 629  | 38.7 | 1.62 | 6 No. 5 | 5.3  | N  | -    | 775  |
| 177 | Khorramian & Sadeghian [19] | 150 | 150 | -   | 37    | 629  | 38.7 | 1.62 | 6 No. 5 | 5.3  | N  | -    | 775  |
| 178 | Khorramian & Sadeghian [19] | 150 | 150 | -   | 37    | 629  | 38.7 | 1.62 | 6 No. 5 | 5.3  | N  | -    | 693  |
| 179 | Khorramian & Sadeghian [19] | 150 | 150 | -   | 37    | 629  | 38.7 | 1.62 | 6 No. 5 | 5.3  | N  | -    | 693  |
| 180 | Khorramian & Sadeghian [19] | 150 | 150 | -   | 37    | 629  | 38.7 | 1.62 | 6 No. 5 | 5.3  | N  | -    | 693  |
| 181 | Khorramian & Sadeghian [19] | 150 | 150 | -   | 37    | 629  | 38.7 | 1.62 | 6 No. 5 | 5.3  | N  | -    | 578  |
| 182 | Khorramian & Sadeghian [19] | 150 | 150 | -   | 37    | 629  | 38.7 | 1.62 | 6 No. 5 | 5.3  | N  | -    | 578  |
| 183 | Khorramian & Sadeghian [19] | 150 | 150 | -   | 37    | 629  | 38.7 | 1.62 | 6 No. 5 | 5.3  | N  | -    | 354  |
| 184 | Khorramian & Sadeghian [19] | 150 | 150 | -   | 37    | 629  | 38.7 | 1.62 | 6 No. 5 | 5.3  | N  | -    | 354  |
| 185 | Maranan et al. [20]         | -   | -   | 250 | 34.42 | 1184 | 62.6 | 1.89 | 6 No. 5 | 2.43 | GH | 3.13 | 1772 |
| 186 | Maranan et al. [20]         | -   | -   | 250 | 34.42 | 1184 | 62.6 | 1.89 | 6 No. 5 | 2.43 | GH | 3.13 | 1791 |
| 187 | Maranan et al. [20]         | -   | -   | 250 | 34.42 | 1184 | 62.6 | 1.89 | 6 No. 5 | 2.43 | GH | 1.57 | 1981 |
| 188 | Maranan et al. [20]         | -   | -   | 250 | 34.42 | 1184 | 62.6 | 1.89 | 6 No. 5 | 2.43 | GH | 0.78 | 1988 |
| 189 | Maranan et al. [20]         | -   | -   | 250 | 34.42 | 1184 | 62.6 | 1.89 | 6 No. 5 | 2.43 | GS | 3.13 | 1838 |
| 190 | Maranan et al. [20]         | -   | -   | 250 | 34.42 | 1184 | 62.6 | 1.89 | 6 No. 5 | 2.43 | GS | 1.57 | 2063 |
| 191 | Maranan et al. [20]         | -   | -   | 250 | 34.42 | 1184 | 62.6 | 1.89 | 6 No. 5 | 2.43 | GH | 1.57 | 1624 |
| 192 | Maranan et al. [20]         | -   | -   | 250 | 34.42 | 1184 | 62.6 | 1.89 | 6 No. 5 | 2.43 | GS | 1.57 | 1208 |
| 193 | Mohamed et al. [21]         | -   | -   | 300 | 42.9  | 934  | 55.4 | 1.56 | 8 No. 5 | 2.2  | GH | 2.23 | 2840 |
| 194 | Mohamed et al. [21]         | -   | -   | 300 | 42.9  | 934  | 55.4 | 1.56 | 8 No. 5 | 2.2  | GH | 2.68 | 2871 |
| 195 | Mohamed et al. [21]         | -   | -   | 300 | 42.9  | 934  | 55.4 | 1.56 | 8 No. 5 | 2.2  | GH | 3.14 | 2935 |
| 196 | Pantelides et al. [22]      | -   | -   | 254 | 36    | 740  | 43.3 | 1.71 | 4 No. 5 | 1.6  | GS | 0.75 | 1975 |
| 197 | Pantelides et al. [22]      | -   | -   | 254 | 36    | 740  | 43.3 | 1.71 | 4 No. 5 | 1.6  | GS | 0.75 | 1788 |
| 198 | Prachasaree et al. [23]     | 150 | 150 | -   | 20.8  | 735  | 50   | 1.5  | 4 No. 3 | 1.4  | SS | 0.01 | 370  |
| 199 | Prachasaree et al. [23]     | 150 | 150 | -   | 20.8  | 735  | 50   | 1.5  | 4 No. 3 | 1.4  | SS | 0.01 | 370  |
| 200 | Prachasaree et al. [23]     | 150 | 150 | -   | 20.8  | 735  | 50   | 1.5  | 4 No. 3 | 1.4  | SS | 0.01 | 370  |
| 201 | Prachasaree et al. [23]     | 150 | 150 | -   | 20.8  | 735  | 50   | 1.5  | 4 No. 3 | 1.4  | SS | 0.02 | 365  |
| 202 | Prachasaree et al. [23]     | 150 | 150 | -   | 20.8  | 735  | 50   | 1.5  | 4 No. 3 | 1.4  | SS | 0.02 | 365  |
| 203 | Prachasaree et al. [23]     | 150 | 150 | -   | 20.8  | 735  | 50   | 1.5  | 4 No. 3 | 1.4  | SS | 0.02 | 365  |
| 204 | Prachasaree et al. [23]     | -   | -   | 150 | 20.8  | 735  | 50   | 1.5  | 4 No. 3 | 1.9  | SS | 0.01 | 345  |
| 205 | Prachasaree et al. [23]     | -   | -   | 150 | 20.8  | 735  | 50   | 1.5  | 4 No. 3 | 1.9  | SS | 0.01 | 345  |
| 206 | Prachasaree et al. [23]     | -   | -   | 150 | 20.8  | 735  | 50   | 1.5  | 4 No. 3 | 1.9  | SS | 0.01 | 345  |

|     |                         |     |     |     |       |      |       |      |             |      |    |      |       |
|-----|-------------------------|-----|-----|-----|-------|------|-------|------|-------------|------|----|------|-------|
| 207 | Prachasaree et al. [23] | -   | -   | 150 | 20.8  | 735  | 50    | 1.5  | 4 No. 3     | 1.9  | SS | 0.02 | 315   |
| 208 | Prachasaree et al. [23] | -   | -   | 150 | 20.8  | 735  | 50    | 1.5  | 4 No. 3     | 1.9  | SS | 0.02 | 315   |
| 209 | Prachasaree et al. [23] | -   | -   | 150 | 20.8  | 735  | 50    | 1.5  | 4 No. 3     | 1.9  | SS | 0.02 | 315   |
| 210 | Prachasaree et al. [23] | 150 | 150 | -   | 20.8  | 735  | 50    | 1.5  | 4 No. 3     | 1.4  | SH | 0.01 | 365   |
| 211 | Prachasaree et al. [23] | 150 | 150 | -   | 20.8  | 735  | 50    | 1.5  | 4 No. 3     | 1.4  | SH | 0.01 | 365   |
| 212 | Prachasaree et al. [23] | 150 | 150 | -   | 20.8  | 735  | 50    | 1.5  | 4 No. 3     | 1.4  | SH | 0.01 | 365   |
| 213 | Prachasaree et al. [23] | 150 | 150 | -   | 20.8  | 735  | 50    | 1.5  | 4 No. 3     | 1.4  | SH | 0.02 | 370   |
| 214 | Prachasaree et al. [23] | 150 | 150 | -   | 20.8  | 735  | 50    | 1.5  | 4 No. 3     | 1.4  | SH | 0.02 | 370   |
| 215 | Prachasaree et al. [23] | 150 | 150 | -   | 20.8  | 735  | 50    | 1.5  | 4 No. 3     | 1.4  | SH | 0.02 | 370   |
| 216 | Sankholkar et al. [24]  | -   | -   | 203 | 50    | 800  | 46.2  | 1.57 | 4 No. 5     | 2.5  | GS | 3.2  | 1353  |
| 217 | Sankholkar et al. [24]  | -   | -   | 203 | 50    | 800  | 46.2  | 1.57 | 4 No. 5     | 2.5  | GS | 3.2  | 1285  |
| 218 | Sankholkar et al. [24]  | -   | -   | 203 | 50    | 800  | 46.2  | 1.57 | 6 No. 5     | 3.7  | GS | 3.2  | 1623  |
| 219 | Sankholkar et al. [24]  | -   | -   | 203 | 50    | 800  | 46.2  | 1.57 | 6 No. 5     | 3.7  | GS | 3.2  | 1570  |
| 220 | Sun et al. [25]         | 150 | 150 | -   | 23.51 | 1103 | 54.1  | 1.5  | 6 No. 3     | 1.04 | SH | 0.63 | 201   |
| 221 | Sun et al. [25]         | 150 | 150 | -   | 23.51 | 1103 | 54.1  | 1.5  | 6 No. 3     | 1.04 | SH | 0.63 | 174   |
| 222 | Sun et al. [25]         | 150 | 150 | -   | 23.51 | 1103 | 54.1  | 1.5  | 6 No. 3     | 1.04 | SH | 0.63 | 181   |
| 223 | Sun et al. [25]         | 150 | 150 | -   | 23.51 | 1103 | 54.1  | 1.5  | 6 No. 3     | 1.04 | SH | 0.63 | 291   |
| 224 | Sun et al. [25]         | 150 | 150 | -   | 23.51 | 1103 | 54.1  | 1.5  | 6 No. 3     | 1.04 | SH | 0.63 | 290   |
| 225 | Sun et al. [25]         | 150 | 150 | -   | 23.51 | 1103 | 54.1  | 1.5  | 6 No. 3     | 1.04 | SH | 0.63 | 347   |
| 226 | Sun et al. [25]         | 150 | 150 | -   | 23.51 | 1103 | 54.1  | 1.5  | 6 No. 3     | 1.04 | SH | 0.63 | 632   |
| 227 | Sun et al. [25]         | 150 | 150 | -   | 23.51 | 1103 | 54.1  | 1.5  | 6 No. 3     | 1.04 | SH | 0.63 | 677   |
| 228 | Sun et al. [25]         | 150 | 150 | -   | 23.51 | 1103 | 54.1  | 1.5  | 6 No. 3     | 1.04 | SH | 0.63 | 602   |
| 229 | Tikka et al. [26]       | 150 | 150 | -   | 25.7  | 630  | 40    | 1.5  | 4 No. 4     | 2.3  | CS | 0.33 | 401   |
| 230 | Tikka et al. [26]       | 150 | 150 | -   | 25.7  | 630  | 40    | 1.5  | 4 No. 4     | 2.3  | CS | 0.33 | 120   |
| 231 | Tikka et al. [26]       | 150 | 150 | -   | 25.7  | 630  | 40    | 1.5  | 6 No. 4     | 3.4  | CS | 0.33 | 215   |
| 232 | Tikka et al. [26]       | 150 | 150 | -   | 25.7  | 630  | 40    | 1.5  | 4 No. 4     | 2.3  | CS | 0.33 | 382   |
| 233 | Tikka et al. [26]       | 150 | 150 | -   | 25.7  | 630  | 40    | 1.5  | 4 No. 4     | 2.3  | CS | 0.33 | 129   |
| 234 | Tikka et al. [26]       | 150 | 150 | -   | 25.7  | 630  | 40    | 1.5  | 6 No. 4     | 3.4  | CS | 0.33 | 220   |
| 235 | Tikka et al. [26]       | 150 | 150 | -   | 25.7  | 630  | 40    | 1.5  | 6 No. 4     | 3.4  | CS | 0.33 | 116   |
| 236 | Tobbi et al. [27]       | 350 | 350 | -   | 32.6  | 728  | 47.6  | 1.53 | 8 No. 6     | 1.9  | GH | 2    | 3929  |
| 237 | Tobbi et al. [27]       | 350 | 350 | -   | 32.6  | 728  | 47.6  | 1.53 | 8 No. 6     | 1.9  | GH | 2    | 3991  |
| 238 | Tobbi et al. [27]       | 350 | 350 | -   | 32.6  | 728  | 47.6  | 1.53 | 9 No. 6     | 1.9  | GH | 1.7  | 4006  |
| 239 | Tobbi et al. [27]       | 350 | 350 | -   | 32.6  | 752  | 48.2  | 1.56 | 12 No. 5    | 1.9  | GH | 3.2  | 3938  |
| 240 | Tobbi et al. [27]       | 350 | 350 | -   | 32.6  | 751  | 48.2  | 1.56 | 12 No. 5    | 1.9  | GH | 4.8  | 4067  |
| 241 | Tobbi et al. [27]       | 350 | 350 | -   | 36.4  | 750  | 48.2  | 1.56 | 8 No. 6     | 1.9  | GH | 2.55 | 4297  |
| 242 | Tobbi et al. [27]       | 350 | 350 | -   | 36.4  | 749  | 48.2  | 1.56 | 12 No. 5    | 1.9  | GH | 3.41 | 4615  |
| 243 | Tobbi et al. [27]       | 350 | 350 | -   | 36.4  | 748  | 48.2  | 1.56 | 4 No. 4 & 5 | 1    | GH | 2.55 | 4212  |
| 244 | Tobbi et al. [27]       | 350 | 350 | -   | 36.4  | 747  | 48.2  | 1.56 | 8 No. 4     | 0.8  | GH | 2.55 | 3900  |
| 245 | Tu et al. [28]          | 200 | 200 | -   | 32.1  | 660  | 44.25 | 1.52 | 4 No. 4     | 1.1  | GH | 5.3  | 970.9 |
| 246 | Tu et al. [28]          | 200 | 200 | -   | 32.1  | 660  | 44.25 | 1.52 | 4 No. 4     | 1.1  | GH | 3.1  | 951.6 |
| 247 | Tu et al. [28]          | 200 | 200 | -   | 32.1  | 660  | 44.25 | 1.52 | 4 No. 4     | 1.1  | GH | 2    | 937.7 |
| 248 | Tu et al. [28]          | 200 | 200 | -   | 32.1  | 735  | 46    | 1.6  | 4 No. 3     | 0.8  | GH | 3.1  | 936.8 |

|     |                |     |     |   |      |     |       |      |         |     |    |     |       |
|-----|----------------|-----|-----|---|------|-----|-------|------|---------|-----|----|-----|-------|
| 249 | Tu et al. [28] | 200 | 200 | - | 32.1 | 660 | 44.25 | 1.52 | 4 No. 4 | 1.5 | GH | 3.1 | 981.7 |
| 250 | Tu et al. [28] | 200 | 200 | - | 32.1 | 660 | 44.25 | 1.52 | 4 No. 4 | 1.1 | GH | 5.2 | 954   |

## References

1. Afifi, M.Z.; Mohamed, H.M. and Benmokrane, B. Axial capacity of circular concrete columns reinforced with GFRP bars and spirals. *Journal of Composites for Construction*, **2014**, 18(1), 04013017. [https://doi.org/10.1061/\(asce\)cc.1943-5614.0000438](https://doi.org/10.1061/(asce)cc.1943-5614.0000438)
2. Afifi, M.Z.; Mohamed, H.M. and Benmokrane, B. Theoretical stress-strain model for circular concrete columns confined by GFRP spirals and hoops. *Engineering Structures*, **2015**, 102, 202-213. <https://doi.org/10.1016/j.engstruct.2015.08.020>
3. AlAjarmeh, O.S.; Manalo, A.C.; Benmokrane, B.; Karunasena, W.; Mendis, P. and Nguyen, K.T.Q. Compressive behavior of axially loaded circular hollow concrete columns reinforced with GFRP bars and spirals. *Construction and Building Materials*, **2019**, 194, 12-23. <https://doi.org/10.1016/j.conbuildmat.2018.11.016>
4. AlAjarmeh, O.S.; Manalo, A.C.; Benmokrane, B.; Karunasena, W. and Mendis, P. Axial performance of hollow concrete columns reinforced with GFRP composite bars with different reinforcement ratios. *Composite Structures*, **2019**, 213, 153-164. <https://doi.org/10.1016/j.compstruct.2019.01.096>
5. Alsayed, S.H.; Al-Salloum, Y.A.; Almusallam, T.H. and Amjad, M.A. Concrete columns reinforced by glass fiber reinforced polymer rods. *Special Publication*, **1999**, 188, 103-112.
6. De Luca, A.; Matta, F. and Nanni, A. Behavior of full-scale GFRP reinforced concrete columns under axial load. *ACI Structural Journal*, **2010**, 107(5), 589-596. <https://doi.org/10.14359/51663912>
7. Dong, M.; Elchalakani, M.; Karrech, A.; Pham, T.M. and Yang, B. Glass fibre-reinforced polymer circular alkali-activated fly ash/slag concrete members under combined loading. *Engineering Structures*, **2019**, 199, 109598. <https://doi.org/10.1016/j.engstruct.2019.109598>
8. Elchalakani, M. and Ma, G. Tests of glass fibre reinforced polymer rectangular concrete columns subjected to concentric and eccentric axial loading. *Engineering Structures*, **2017**, 151, 93-104. <https://doi.org/10.1016/j.engstruct.2017.08.023>
9. Elchalakani, M.; Ma, G.; Aslani, F. and Duan, W. Design of GFRP-reinforced rectangular concrete columns under eccentric axial loading. *Magazine of Concrete Research*, **2017**, 69(17), 865-877. <https://doi.org/10.1680/jmacr.16.00437>
10. Guérin, M.; Mohamed, H.M.; Benmokrane, B.; Nanni, A. and Shield, C.K. Eccentric Behavior of Full-Scale Reinforced Concrete Columns with Glass Fiber-Reinforced Polymer Bars and Ties. *ACI Structural Journal*, **2018**, 115(2). <https://doi.org/10.14359/51701107>
11. Guérin, M.; Mohamed, H.M.; Benmokrane, B.; Shield, C.K. and Nanni, A. Effect of glass fiber-reinforced polymer reinforcement ratio on axial-flexural strength of reinforced concrete columns. *ACI Structural Journal*, **2018**, 115(4), 1049-3. <https://doi.org/10.14359/51701279>
12. Hadhood, A.; Mohamed, H.M. and Benmokrane, B. Axial load-moment interaction diagram of circular concrete columns reinforced with CFRP bars and spirals: experimental and theoretical investigations. *Journal of Composites for Construction*, **2017**, 21(2), 04016092. [https://doi.org/10.1061/\(asce\)cc.1943-5614.0000748](https://doi.org/10.1061/(asce)cc.1943-5614.0000748)
13. Hadhood, A.; Mohamed, H.M. and Benmokrane, B. Assessing stress-block parameters in designing circular high-strength concrete members reinforced with FRP bars. *Journal of Structural Engineering*, **2018**, 144(10), 04018182. [https://doi.org/10.1061/\(asce\)st.1943-541x.0002173](https://doi.org/10.1061/(asce)st.1943-541x.0002173)
14. Hadi, M.N.; Karim, H. and Sheikh, M.N. Experimental investigations on circular concrete columns reinforced with GFRP bars and helices under different loading conditions. *Journal of Composites for Construction*, **2016**, 20(4), 04016009. [https://doi.org/10.1061/\(asce\)cc.1943-5614.0000670](https://doi.org/10.1061/(asce)cc.1943-5614.0000670)

15. Hadi, M.N. and Youssef, J. Experimental investigation of GFRP-reinforced and GFRP-encased square concrete specimens under axial and eccentric load, and four-point bending test. *Journal of Composites for Construction*, **2016**, 20(5), 04016020. [https://doi.org/10.1061/\(asce\)cc.1943-5614.0000675](https://doi.org/10.1061/(asce)cc.1943-5614.0000675)
16. Hassan, A.; Khairallah, F.; Mamdouh, H. and Kamal, M. Structural behaviour of self-compacting concrete columns reinforced by steel and glass fibre-reinforced polymer rebars under eccentric loads. *Engineering Structures*, **2019**, 188, 717-728. <https://doi.org/10.1016/j.engstruct.2019.03.067>
17. Karim, H.; Sheikh, M.N. and Hadi, M.N. Axial load-axial deformation behaviour of circular concrete columns reinforced with GFRP bars and helices. *Construction and Building Materials*, **2016**, 112, 1147-1157. <https://doi.org/10.1016/j.conbuildmat.2016.02.219>
18. Khan, Q.S.; Sheikh, M.N. and Hadi, M.N. Axial-flexural interactions of GFRP-CFFT columns with and without reinforcing GFRP bars. *Journal of composites for construction*, **2017**, 21(3), 04016109. [https://doi.org/10.1061/\(asce\)cc.1943-5614.0000771](https://doi.org/10.1061/(asce)cc.1943-5614.0000771)
19. Khorramian, K. and Sadeghian, P. Experimental and analytical behavior of short concrete columns reinforced with GFRP bars under eccentric loading. *Engineering structures*, **2017**, 151, 761-773. <https://doi.org/10.1016/j.engstruct.2017.08.064>
20. Maranan, G.B.; Manalo, A.C.; Benmokrane, B.; Karunasena, W. and Mendis, P. Behavior of concentrically loaded geopolymer-concrete circular columns reinforced longitudinally and transversely with GFRP bars. *Engineering Structures*, **2016**, 117, 422-436. <https://doi.org/10.1016/j.engstruct.2016.03.036>
21. Mohamed, H.M.; Afifi, M.Z. and Benmokrane, B. Performance evaluation of concrete columns reinforced longitudinally with FRP bars and confined with FRP hoops and spirals under axial load. *Journal of Bridge Engineering*, **2014**, 19(7), 04014020. [https://doi.org/10.1061/\(asce\)be.1943-5592.0000590](https://doi.org/10.1061/(asce)be.1943-5592.0000590)
22. Pantelides, C.P.; Gibbons, M.E. and Reaveley, L.D. Axial load behavior of concrete columns confined with GFRP spirals. *Journal of Composites for Construction*, **2013**, 17(3), 305-313. [https://doi.org/10.1061/\(asce\)cc.1943-5614.0000357](https://doi.org/10.1061/(asce)cc.1943-5614.0000357)
23. Prachasaree, W.; Piriyaakootorn, S.; Sangsrijun, A. and Limkatanyu, S. Behavior and performance of GFRP reinforced concrete columns with various types of stirrups. *International Journal of Polymer Science*, **2015**, 2015. <https://doi.org/10.1155/2015/237231>
24. Sankholkar, P.P.; Pantelides, C.P. and Hales, T.A. Confinement model for concrete columns reinforced with GFRP spirals. *Journal of Composites for Construction*, **2018**, 22(3), 04018007. [https://doi.org/10.1061/\(asce\)cc.1943-5614.0000843](https://doi.org/10.1061/(asce)cc.1943-5614.0000843)
25. Sun, L.; Wei, M. and Zhang, N. Experimental study on the behavior of GFRP reinforced concrete columns under eccentric axial load. *Construction and Building Materials*, **2017**, 152, 214-225. <https://doi.org/10.1016/j.conbuildmat.2017.06.159>
26. Tikka, T.; Francis, M. and Teng, B. Strength of concrete beam-columns reinforced with GFRP bars. in 2nd International Structures Specialty Conference, Winnipeg, MB, Canada. 2010.
27. Tobbi, H.; Farghaly, A.S. and Benmokrane, B. Concrete Columns Reinforced Longitudinally and Transversally with Glass Fiber-Reinforced Polymer Bars. *ACI Structural Journal*, **2012**, 109(4). <https://doi.org/10.14359/51683874>
28. Tu, J.; Gao, K.; He, L. and Li, X. Experimental study on the axial compression performance of GFRP-reinforced concrete square columns. *Advances in Structural Engineering*, **2019**, 22(7), 1554-1565. <https://doi.org/10.1177/1369433218817988>
